# Supplementary material for: Next generation sequencing profiling identifies miR-574-3p and miR-660-5p as potential novel prognostic markers for breast cancer
Source: PubMed Central journal article supplement (PMC4587870; doi:10.1186/s12864-015-1899-0), 2015-09-29

Sources of Variation

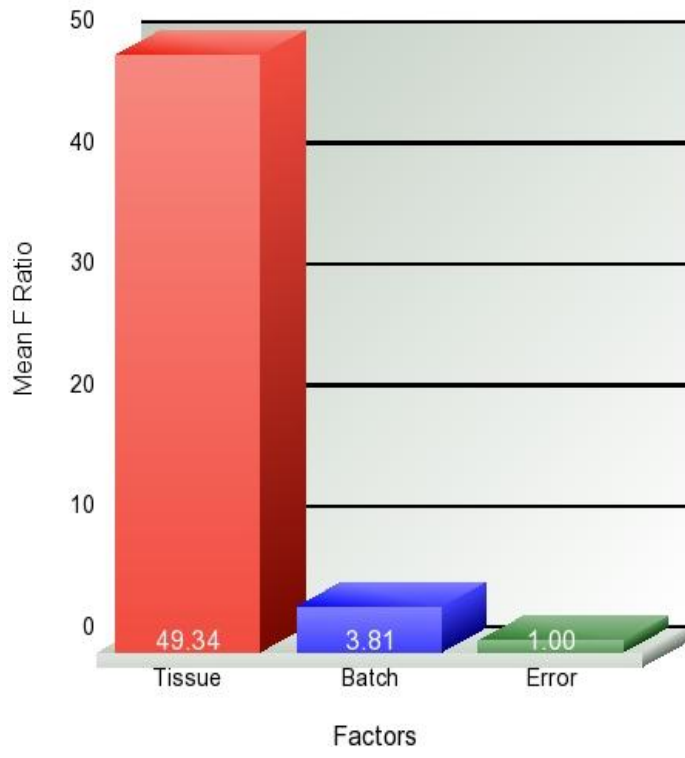

Sources of Variation

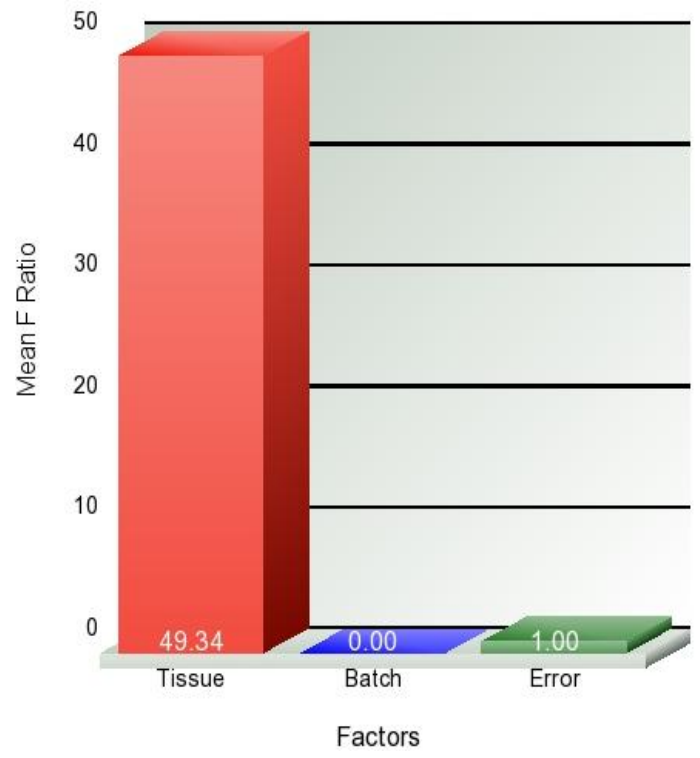

Supplement: 12864_2015_1899_MOESM1_ESM.pdf [file 12864_2015_1899_MOESM1_ESM.pdf]
