# Supplementary material for: Next generation sequencing profiling identifies miR-574-3p and miR-660-5p as potential novel prognostic markers for breast cancer
Source: PubMed Central journal article supplement (PMC4587870; doi:10.1186/s12864-015-1899-0), 2015-09-29
Supplement: 12864_2015_1899_MOESM2_ESM.pdf [file 12864_2015_1899_MOESM2_ESM.pdf]

| <b>miRNA ID</b>   | <b>p-value</b> | <b>FDR</b> | <b>Fold Change</b> | <b>Direction of Fold change</b> |
|-------------------|----------------|------------|--------------------|---------------------------------|
| hsa-let-7a-5p     | 2.32E-20       | 1.35E-19   | -3.71714           | Down-regulated in tumor         |
| hsa-let-7b-3p     | 2.00E-32       | 3.10E-31   | -12.9996           | Down-regulated in tumor         |
| hsa-let-7b-5p     | 9.92E-21       | 6.59E-20   | -4.77593           | Down-regulated in tumor         |
| hsa-let-7c-5p     | 8.16E-30       | 9.62E-29   | -8.04453           | Down-regulated in tumor         |
| hsa-let-7d-3p     | 1.04E-29       | 1.07E-28   | -16.2072           | Down-regulated in tumor         |
| hsa-let-7d-5p     | 9.82E-09       | 2.77E-08   | -2.20639           | Down-regulated in tumor         |
| hsa-let-7e-5p     | 1.98E-06       | 3.68E-06   | -2.20181           | Down-regulated in tumor         |
| hsa-let-7f-5p     | 1.35E-08       | 3.58E-08   | 5.96238            | Up-regulated in tumor           |
| hsa-let-7i-5p     | 5.18E-05       | 8.03E-05   | 2.9048             | Up-regulated in tumor           |
| hsa-miR-101-3p    | 2.71E-06       | 4.84E-06   | 5.0085             | Up-regulated in tumor           |
| hsa-miR-103a-3p   | 9.08E-08       | 2.06E-07   | 6.93112            | Up-regulated in tumor           |
| hsa-miR-107       | 1.76E-07       | 3.72E-07   | 10.8589            | Up-regulated in tumor           |
| hsa-miR-10a-5p    | 0.0347755      | 0.0347755  | 2.41909            | Up-regulated in tumor           |
| hsa-miR-125a-5p   | 5.30E-37       | 1.23E-35   | -9.59744           | Down-regulated in tumor         |
| hsa-miR-125b-5p   | 4.12E-29       | 3.83E-28   | -4.909             | Down-regulated in tumor         |
| hsa-miR-126-3p    | 0.0008268      | 0.0010534  | 3.04256            | Up-regulated in tumor           |
| hsa-miR-126-5p    | 0.0002196      | 0.0003094  | 12.2333            | Up-regulated in tumor           |
| hsa-miR-141-3p    | 0.015057       | 0.0159125  | 4.03387            | Up-regulated in tumor           |
| hsa-miR-142-5p    | 0.0175575      | 0.0183466  | 26.742             | Up-regulated in tumor           |
| hsa-miR-145-5p    | 3.05E-19       | 1.49E-18   | -4.44216           | Down-regulated in tumor         |
| hsa-miR-148a-3p   | 0.0014697      | 0.0017984  | 5.75801            | Up-regulated in tumor           |
| hsa-miR-148a-5p   | 0.0044288      | 0.0050849  | -2.00773           | Down-regulated in tumor         |
| hsa-miR-150-5p    | 5.96E-09       | 1.73E-08   | -3.8121            | Down-regulated in tumor         |
| hsa-miR-151a-3p   | 0.0001104      | 0.0001604  | 2.99004            | Up-regulated in tumor           |
| hsa-miR-155-5p    | 0.0304092      | 0.0310775  | 2.53284            | Up-regulated in tumor           |
| hsa-miR-15a-5p    | 4.24E-08       | 1.04E-07   | 12.1568            | Up-regulated in tumor           |
| hsa-miR-15b-5p    | 9.93E-18       | 4.40E-17   | -2.91538           | Down-regulated in tumor         |
| hsa-miR-16-5p     | 3.00E-11       | 1.12E-10   | 27.2819            | Up-regulated in tumor           |
| hsa-miR-17-5p     | 0.0049192      | 0.0055791  | 3.57987            | Up-regulated in tumor           |
| hsa-miR-181a-2-3p | 6.09E-05       | 9.28E-05   | -2.04284           | Down-regulated in tumor         |
| hsa-miR-181a-5p   | 1.70E-09       | 5.27E-09   | -2.35667           | Down-regulated in tumor         |
| hsa-miR-181d-5p   | 0.0049893      | 0.0055905  | 3.80132            | Up-regulated in tumor           |
| hsa-miR-182-5p    | 0.0287213      | 0.0296787  | 33.0627            | Up-regulated in tumor           |
| hsa-miR-183-5p    | 0.0058226      | 0.0064464  | 9.66818            | Up-regulated in tumor           |
| hsa-miR-192-5p    | 0.0031425      | 0.0037468  | 2.93814            | Up-regulated in tumor           |
| hsa-miR-193b-3p   | 3.25E-15       | 1.37E-14   | -4.338             | Down-regulated in tumor         |
| hsa-miR-195-5p    | 0.0036828      | 0.0042812  | 2.86077            | Up-regulated in tumor           |

|                 |           |           |          |                         |
|-----------------|-----------|-----------|----------|-------------------------|
| hsa-miR-196b-5p | 0.0133398 | 0.0142598 | 57.9456  | Up-regulated in tumor   |
| hsa-miR-197-3p  | 6.00E-41  | 2.79E-39  | -13.9857 | Down-regulated in tumor |
| hsa-miR-199a-3p | 2.53E-05  | 4.15E-05  | 13.2278  | Up-regulated in tumor   |
| hsa-miR-199a-5p | 0.0003248 | 0.0004442 | 5.4778   | Up-regulated in tumor   |
| hsa-miR-199b-3p | 2.55E-05  | 4.15E-05  | 13.3249  | Up-regulated in tumor   |
| hsa-miR-199b-5p | 0.000889  | 0.0011173 | 3.65272  | Up-regulated in tumor   |
| hsa-miR-19b-3p  | 1.12E-08  | 3.07E-08  | 3.36478  | Up-regulated in tumor   |
| hsa-miR-200b-3p | 0.0111238 | 0.0121707 | 3.75366  | Up-regulated in tumor   |
| hsa-miR-205-5p  | 0.0004903 | 0.0006343 | -2.48868 | Down-regulated in tumor |
| hsa-miR-20a-5p  | 0.0001847 | 0.0002642 | 17.929   | Up-regulated in tumor   |
| hsa-miR-21-3p   | 0.0025673 | 0.0031008 | 10.1748  | Up-regulated in tumor   |
| hsa-miR-214-3p  | 4.35E-27  | 3.11E-26  | -5.77584 | Down-regulated in tumor |
| hsa-miR-21-5p   | 5.84E-08  | 1.39E-07  | 3.87058  | Up-regulated in tumor   |
| hsa-miR-22-3p   | 0.0013836 | 0.0017157 | 2.4562   | Up-regulated in tumor   |
| hsa-miR-24-3p   | 3.50E-05  | 5.52E-05  | 2.43084  | Up-regulated in tumor   |
| hsa-miR-26b-5p  | 8.99E-07  | 1.74E-06  | 32.233   | Up-regulated in tumor   |
| hsa-miR-27a-3p  | 6.42E-08  | 1.49E-07  | 6.4593   | Up-regulated in tumor   |
| hsa-miR-27b-3p  | 2.23E-06  | 4.07E-06  | 4.34738  | Up-regulated in tumor   |
| hsa-miR-28-3p   | 5.06E-06  | 8.71E-06  | -2.04801 | Down-regulated in tumor |
| hsa-miR-28-5p   | 0.033187  | 0.0335477 | 2.1824   | Up-regulated in tumor   |
| hsa-miR-29c-3p  | 7.34E-07  | 1.45E-06  | 2.89628  | Up-regulated in tumor   |
| hsa-miR-30a-5p  | 0.0124884 | 0.0135049 | 12.8942  | Up-regulated in tumor   |
| hsa-miR-30e-5p  | 1.23E-06  | 2.34E-06  | 24.3863  | Up-regulated in tumor   |
| hsa-miR-320a    | 6.53E-45  | 6.07E-43  | -7.08391 | Down-regulated in tumor |
| hsa-miR-335-5p  | 0.0004911 | 0.0006343 | 21.7075  | Up-regulated in tumor   |
| hsa-miR-340-5p  | 1.11E-09  | 3.56E-09  | 2.5164   | Up-regulated in tumor   |
| hsa-miR-342-3p  | 0.0003624 | 0.0004885 | 6.19359  | Up-regulated in tumor   |
| hsa-miR-34a-5p  | 1.93E-05  | 3.27E-05  | 13.3181  | Up-regulated in tumor   |
| hsa-miR-378a-3p | 9.60E-05  | 0.0001417 | -2.31521 | Down-regulated in tumor |
| hsa-miR-409-3p  | 3.47E-12  | 1.34E-11  | -3.5944  | Down-regulated in tumor |
| hsa-miR-423-3p  | 1.79E-35  | 3.33E-34  | -5.45872 | Down-regulated in tumor |
| hsa-miR-423-5p  | 9.69E-39  | 3.00E-37  | -11.2111 | Down-regulated in tumor |
| hsa-miR-429     | 0.000259  | 0.0003595 | 2.46338  | Up-regulated in tumor   |
| hsa-miR-486-5p  | 1.31E-20  | 8.13E-20  | -15.2202 | Down-regulated in tumor |
| hsa-miR-497-5p  | 1.86E-07  | 3.84E-07  | -2.78244 | Down-regulated in tumor |
| hsa-miR-574-3p  | 8.28E-30  | 9.62E-29  | -5.80108 | Down-regulated in tumor |
| hsa-miR-654-3p  | 4.82E-10  | 1.66E-09  | -3.64477 | Down-regulated in tumor |
| hsa-miR-660-5p  | 7.13E-07  | 1.44E-06  | 12.8884  | Up-regulated in tumor   |
| hsa-miR-92a-3p  | 2.22E-28  | 1.88E-27  | -5.3314  | Down-regulated in tumor |

|                |          |           |          |                         |
|----------------|----------|-----------|----------|-------------------------|
| hsa-miR-92b-3p | 8.75E-10 | 2.91E-09  | -3.14854 | Down-regulated in tumor |
| hsa-miR-93-5p  | 0.003216 | 0.0037859 | 3.53509  | Up-regulated in tumor   |
| hsa-miR-98-5p  | 1.11E-07 | 2.40E-07  | 22.146   | Up-regulated in tumor   |
| hsa-miR-99b-5p | 1.36E-12 | 5.50E-12  | -2.32803 | Down-regulated in tumor |
