# Supplementary material for: Next generation sequencing profiling identifies miR-574-3p and miR-660-5p as potential novel prognostic markers for breast cancer
Source: PubMed Central journal article supplement (PMC4587870; doi:10.1186/s12864-015-1899-0), 2015-09-29
Supplement: 12864_2015_1899_MOESM3_ESM.pdf [file 12864_2015_1899_MOESM3_ESM.pdf]

| <b>Gene ontology term</b>        | <b>miRNA ID</b>                     | <b>Gene targets</b>                                                                                                                                                                                                                |
|----------------------------------|-------------------------------------|------------------------------------------------------------------------------------------------------------------------------------------------------------------------------------------------------------------------------------|
| <b><i>Transcription</i></b>      | hsa-miR-660-5p                      | EGR2, NPAS3, ZBTB34, RFX4, EPAS1, NFAT5, ETV1, NR3C1, MEIS1                                                                                                                                                                        |
|                                  | hsa-miR-374a-3p;<br>hsa-miR-374a-5p | CEBPA, HLF, ZBTB34, EGR2, BACH2, RFX4, EPAS1, ARID5B, ONECUT2, TLE4, CREB5, NFIX, NEUROG2, NR3C1, TCEAL7, LMX1A, MEIS1, EBF3, PNRC1, GBX2, HOXA10, SHOX, NFIB                                                                      |
|                                  | hsa-miR-221-3p                      | CDKN1C, SOX10, FOS, NTF3, GATA4, HOXA7, NFAT5, IGF1, GLI2, FOXP2, ZFP36, ZFP36L2, EIF4E3, QKI, TNRC6B                                                                                                                              |
|                                  | hsa-miR-196a-5p                     | ING5, ERG, ZNF516, HOXA5, E2F7, BCL11A, HOXA7, HOXA9, TGFBR3, HABP4, IGF1, HMGA2, LIN28B, FOXP2                                                                                                                                    |
|                                  | hsa-miR-27a-3p                      | MEF2C, ING5, ZNF516, ZBTB34, E2F7, PPARG, ONECUT2, SOX7, EHF, PRDM16, SOX8, NPAS3, HOXA5, NR1D2, BCL11A, NFAT5, HOXA10, ERG, SMAD9, RUNX1T1, PPARGC1B, NRIP2, FOXP2, FOXN4, ZFH4, HOXC11, ATF3, EBF3, BCORL1, NEUROD4, CAND1, NFIB |
| <b><i>Cell morphogenesis</i></b> | hsa-miR-374a-3p;<br>hsa-miR-374a-5p | BMP2, EGR2, NTF3, ONECUT2, NEUROG2, L1CAM, LMX1A, SLIT3, SEMA5A, EPHA4, DMD, GBX2, CNTN4                                                                                                                                           |
|                                  | hsa-miR-221-3p                      | NTF3, PVRL1, DCX, GLI2, CXCL12                                                                                                                                                                                                     |
|                                  | hsa-miR-27a-3p                      | EGFR, SEMA6A, MAP1B, PRICKLE2, ONECUT2, LIFR, TGFBR3, RELN, NRXN1, NGFR, DCX, CACNA1A                                                                                                                                              |
| <b><i>Cell motion</i></b>        | hsa-miR-374a-3p;<br>hsa-miR-374a-5p | SEMA5A, EPHA4, EGR2, NTF3, ARID5B, GBX2, NEUROG2, L1CAM, CNTN4, LMX1A, PPAP2B, SLIT3                                                                                                                                               |
|                                  | hsa-miR-221-3p                      | NTF3, PVRL1, WASF2, EMX2, IGF1, KIT, DCX, GLI2, CXCL12                                                                                                                                                                             |

|                           |                                     |                                                                                                                                                              |
|---------------------------|-------------------------------------|--------------------------------------------------------------------------------------------------------------------------------------------------------------|
|                           | hsa-miR-196a-5p                     | PDGFRA, TGFBR3, IGF1, SEMA3A<br>RET, MET, IGF1, NRXN1, COL5A1, SEMA6A,                                                                                       |
|                           | hsa-miR-27a-3p                      | BTG1, TGFBR3, NEUROD4, RELN, NGFR,<br>DCX, PPAP2B                                                                                                            |
|                           | hsa-miR-15a-5p                      | BDNF, PVRL1, PODXL, TGFBR3, IGF1, RELN,<br>SEMA3A, LAMC1, CX3CL1, PPAP2A, FGF2,<br>PPAP2B                                                                    |
| <b>Angiogenesis</b>       | hsa-miR-374a-3p;<br>hsa-miR-374a-5p | SEMA5A, EPAS1, FGF9, GBX2, TGFA                                                                                                                              |
|                           | hsa-miR-15a-5p                      | RTN4, MEOX2, FGF9, PLCD1, FGF1, FIGF,<br>FGF2                                                                                                                |
| <b>Cell migration</b>     | hsa-miR-221-3p                      | PDGFA, IGF1, KIT, CXCL12, PIK3R1                                                                                                                             |
|                           | hsa-miR-27a-3p                      | RET, BTG1, MET, TGFBR3, NEUROD4, RELN,<br>DCX, PPAP2B, COL5A1                                                                                                |
|                           | hsa-miR-15a-5p                      | PODXL, TGFBR3, RELN, LAMC1, CX3CL1,<br>PPAP2A, FGF2, PPAP2B                                                                                                  |
| <b>Cell proliferation</b> | hsa-miR-221-3p                      | ZFP36L2, PDGFA, EMX2, IGF1, KIT, NRG1,<br>GLI2, CXCL12                                                                                                       |
|                           | hsa-miR-196a-5p                     | TGFBR3, IGF1, FOXP2                                                                                                                                          |
|                           | hsa-miR-15a-5p                      | TXNIP, FGFR1, FGF7, FGF9, E2F7, IGF1,<br>FOXP2, PTHLH, BDNF, TRIM35, TBRG1,<br>TGFBR3, ADAMTS1, RARB, LAMC1, AXIN2,<br>PPAP2A, FGF1, NRG1, FIGF, FGF2, HTR2A |
| <b>Cell signaling</b>     | hsa-miR-221-3p                      | NTF3, PVRL1, PDGFA, FGF14, GATA4, KCNA1,<br>CACNB4, CXCL11, GLI2, NOVA1                                                                                      |
|                           | hsa-miR-27a-3p                      | STX1A, FGF14, CACNB2, NRXN1, GRIA4, LEP,<br>SPRY2, ECE2, PDE7B, WISP1, HOXC11, FGF1,<br>CACNA1A, NOVA1, DTNA                                                 |
|                           | hsa-miR-15a-5p                      | STX1A, KCNC4, FGF9, NLGN1, PTHLH, BDNF,<br>WISP1, KIF1B, HOXC11, PVRL1, GRM7, FGF1,                                                                          |

|                                                    |                                     |                                                                       |
|----------------------------------------------------|-------------------------------------|-----------------------------------------------------------------------|
|                                                    |                                     | CHRNE, FGF2, HTR2A                                                    |
| <i>Blood vessel development</i>                    | hsa-miR-221-3p                      | RECK, PDGFA, WASF2, QKI, CXCL12                                       |
|                                                    | hsa-miR-15a-5p                      | RTN4, RECK, MEOX2, FGF9, TGFBR3, QKI, PLCD1, FGF1, FIGF, FGF2, PPAP2B |
| <i>Cytoskeleton organization</i>                   | hsa-miR-146b-5p                     | PRC1, WASF3, TLN2, WASF2, ABL2                                        |
| <i>Response to estrogen stimulus</i>               | hsa-miR-27a-3p                      | PPARG, MAP1B, PDGFRA, MMP13, CCNA2                                    |
| <i>Positive regulation of cell differentiation</i> | hsa-miR-27a-3p                      | LEP, LPL, ACVR2A, SMAD9, BTG1, CSF1, PPARG, MAP1B, NGFR               |
| <i>Regulation of cell division</i>                 | hsa-miR-15a-5p                      | FGF7, FGF9, FGF1, FIGF, FGF2                                          |
| <i>Regulation of cell growth</i>                   | hsa-miR-15a-5p                      | RTN4, EXTL3, WISP1, TSPYL2, SEMA3A, NRG1, FGF2, CRIM1                 |
| <i>Mammary gland development</i>                   | hsa-miR-221-3p                      | IGF1, NRG1, GLI2                                                      |
| <i>Mesenchymal cell differentiation</i>            | hsa-miR-374a-3p;<br>hsa-miR-374a-5p | BMP2, GBX2, CYP26A1                                                   |
